# Supplementary material for: Low-temperature and facile solution-processed two-dimensional TiS2 as an effective electron transport layer for UV-stable planar perovskite solar cells
Source: Royal Society of Chemistry journal article supplement (doi:10.1039/c8ta01143e), 2018-01-01
Supplement: c8ta01143e1.pdf [file c8ta01143e1.pdf]

Supporting Information:

## **A low-temperature and facile solution-processed two-dimensional TiS<sub>2</sub> as an effective electron transport layer for UV-stable planar perovskite solar cell**

Guannan Yin,<sup>a</sup> Huan Zhao,<sup>a</sup> Jiangshan Feng,<sup>a</sup> Jie Sun,<sup>a</sup> Junqing Yan,<sup>a</sup> Zhike Liu<sup>\*a</sup>, Shenghuang Lin<sup>\*b</sup> and Shengzhong (Frank) Liu<sup>a</sup>

<sup>a</sup>Key Laboratory of Applied Surface and Colloid Chemistry, Ministry of Education; Shaanxi Key Laboratory for Advanced Energy Devices; Shaanxi Engineering Lab for Advanced Energy Technology, School of Materials Science and Engineering, Shaanxi Normal University, Xi'an 710119, China

<sup>b</sup>Department of Applied Physics, The Hong Kong Polytechnic University, Hong Kong, China

Corresponding Author

\*E-mail: zhike2015@snnu.edu.cn; shenghuanglinchina@gmail.com

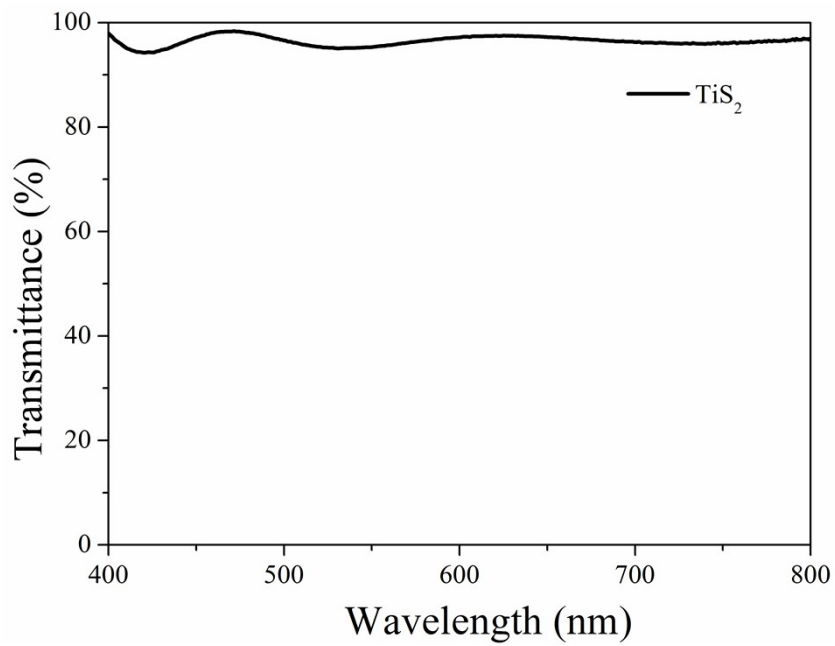

**Figure S1.** Transmittance spectrum of the as-deposited TiS<sub>2</sub> film on glass substrates.

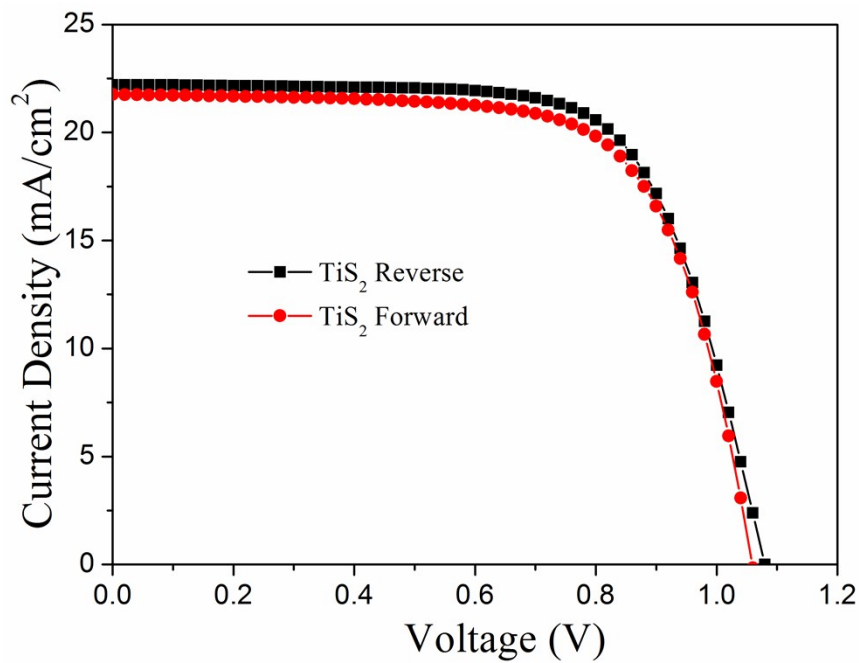

**Figure S2.** J-V curves of the PSC based on TiS<sub>2</sub> ETL under reverse and forward scans.

**Table S1.** The photovoltaic parameters of the PSCs based on TiS<sub>2</sub> ETLs that prepared with different concentration of solution.

| Concentration<br>(mg/ml) | $V_{oc}$<br>(V) | $J_{sc}$<br>(mA/cm <sup>2</sup> ) | FF<br>(%) | PCE<br>(%) | $R_s$<br>( $\Omega$ ) | $R_{sh}$<br>( $\Omega$ ) |
|--------------------------|-----------------|-----------------------------------|-----------|------------|-----------------------|--------------------------|
| 4.0                      | 0.96            | 21.9                              | 51.8      | 10.8       | 159.3                 | 11719.3                  |
| 2.0                      | 1.04            | 21.7                              | 57.8      | 13.1       | 131.6                 | 25008.6                  |
| 1.5                      | 1.10            | 21.5                              | 64.0      | 15.2       | 110.3                 | 41285.5                  |
| 1.0                      | 1.08            | 21.8                              | 66.0      | 15.5       | 105.6                 | 76849.5                  |
| 0.7                      | 1.01            | 21.00                             | 64.7      | 13.7       | 85.4                  | 8761.0                   |
| 0.5                      | 1.02            | 20.00                             | 65.5      | 13.3       | 90.7                  | 7398.3                   |

**Table S2.** The photovoltaic parameters of the PSCs based on TiS<sub>2</sub> ETLs that prepared with different spin-coating speeds.

| Spin-coating speed | $V_{oc}$ (V) | $J_{sc}$ (mA/cm <sup>2</sup> ) | FF (%) | PCE (%) |
|--------------------|--------------|--------------------------------|--------|---------|
| 3000 rpm           | 1.02         | 22.18                          | 69.79  | 15.71   |
| 4000 rpm           | 1.05         | 21.83                          | 70.73  | 16.27   |
| 5000 rpm           | 1.09         | 21.49                          | 71.23  | 16.63   |
| 6000 rpm           | 1.09         | 21.37                          | 71.24  | 16.55   |

**Table S3.** The photovoltaic parameters of the PSCs with no ETL, a TiO<sub>2</sub> ETL, and a TiS<sub>2</sub> ETL, respectively.

| ETL              | $V_{oc}$ (V) | $J_{sc}$ (mA/cm <sup>2</sup> ) | FF (%) | PCE (%) |
|------------------|--------------|--------------------------------|--------|---------|
| No ETL           | 0.97         | 14.52                          | 62.03  | 8.71    |
| TiO <sub>2</sub> | 1.06         | 21.72                          | 74.14  | 17.07   |
| TiS <sub>2</sub> | 1.09         | 21.49                          | 71.23  | 16.63   |
